# Supplementary figures and images for: First Molecular Phylogeny of Lumbrineridae (Annelida)
Source: MDPI journal article supplement (doi:10.3390/d14020083), 2022-01-25

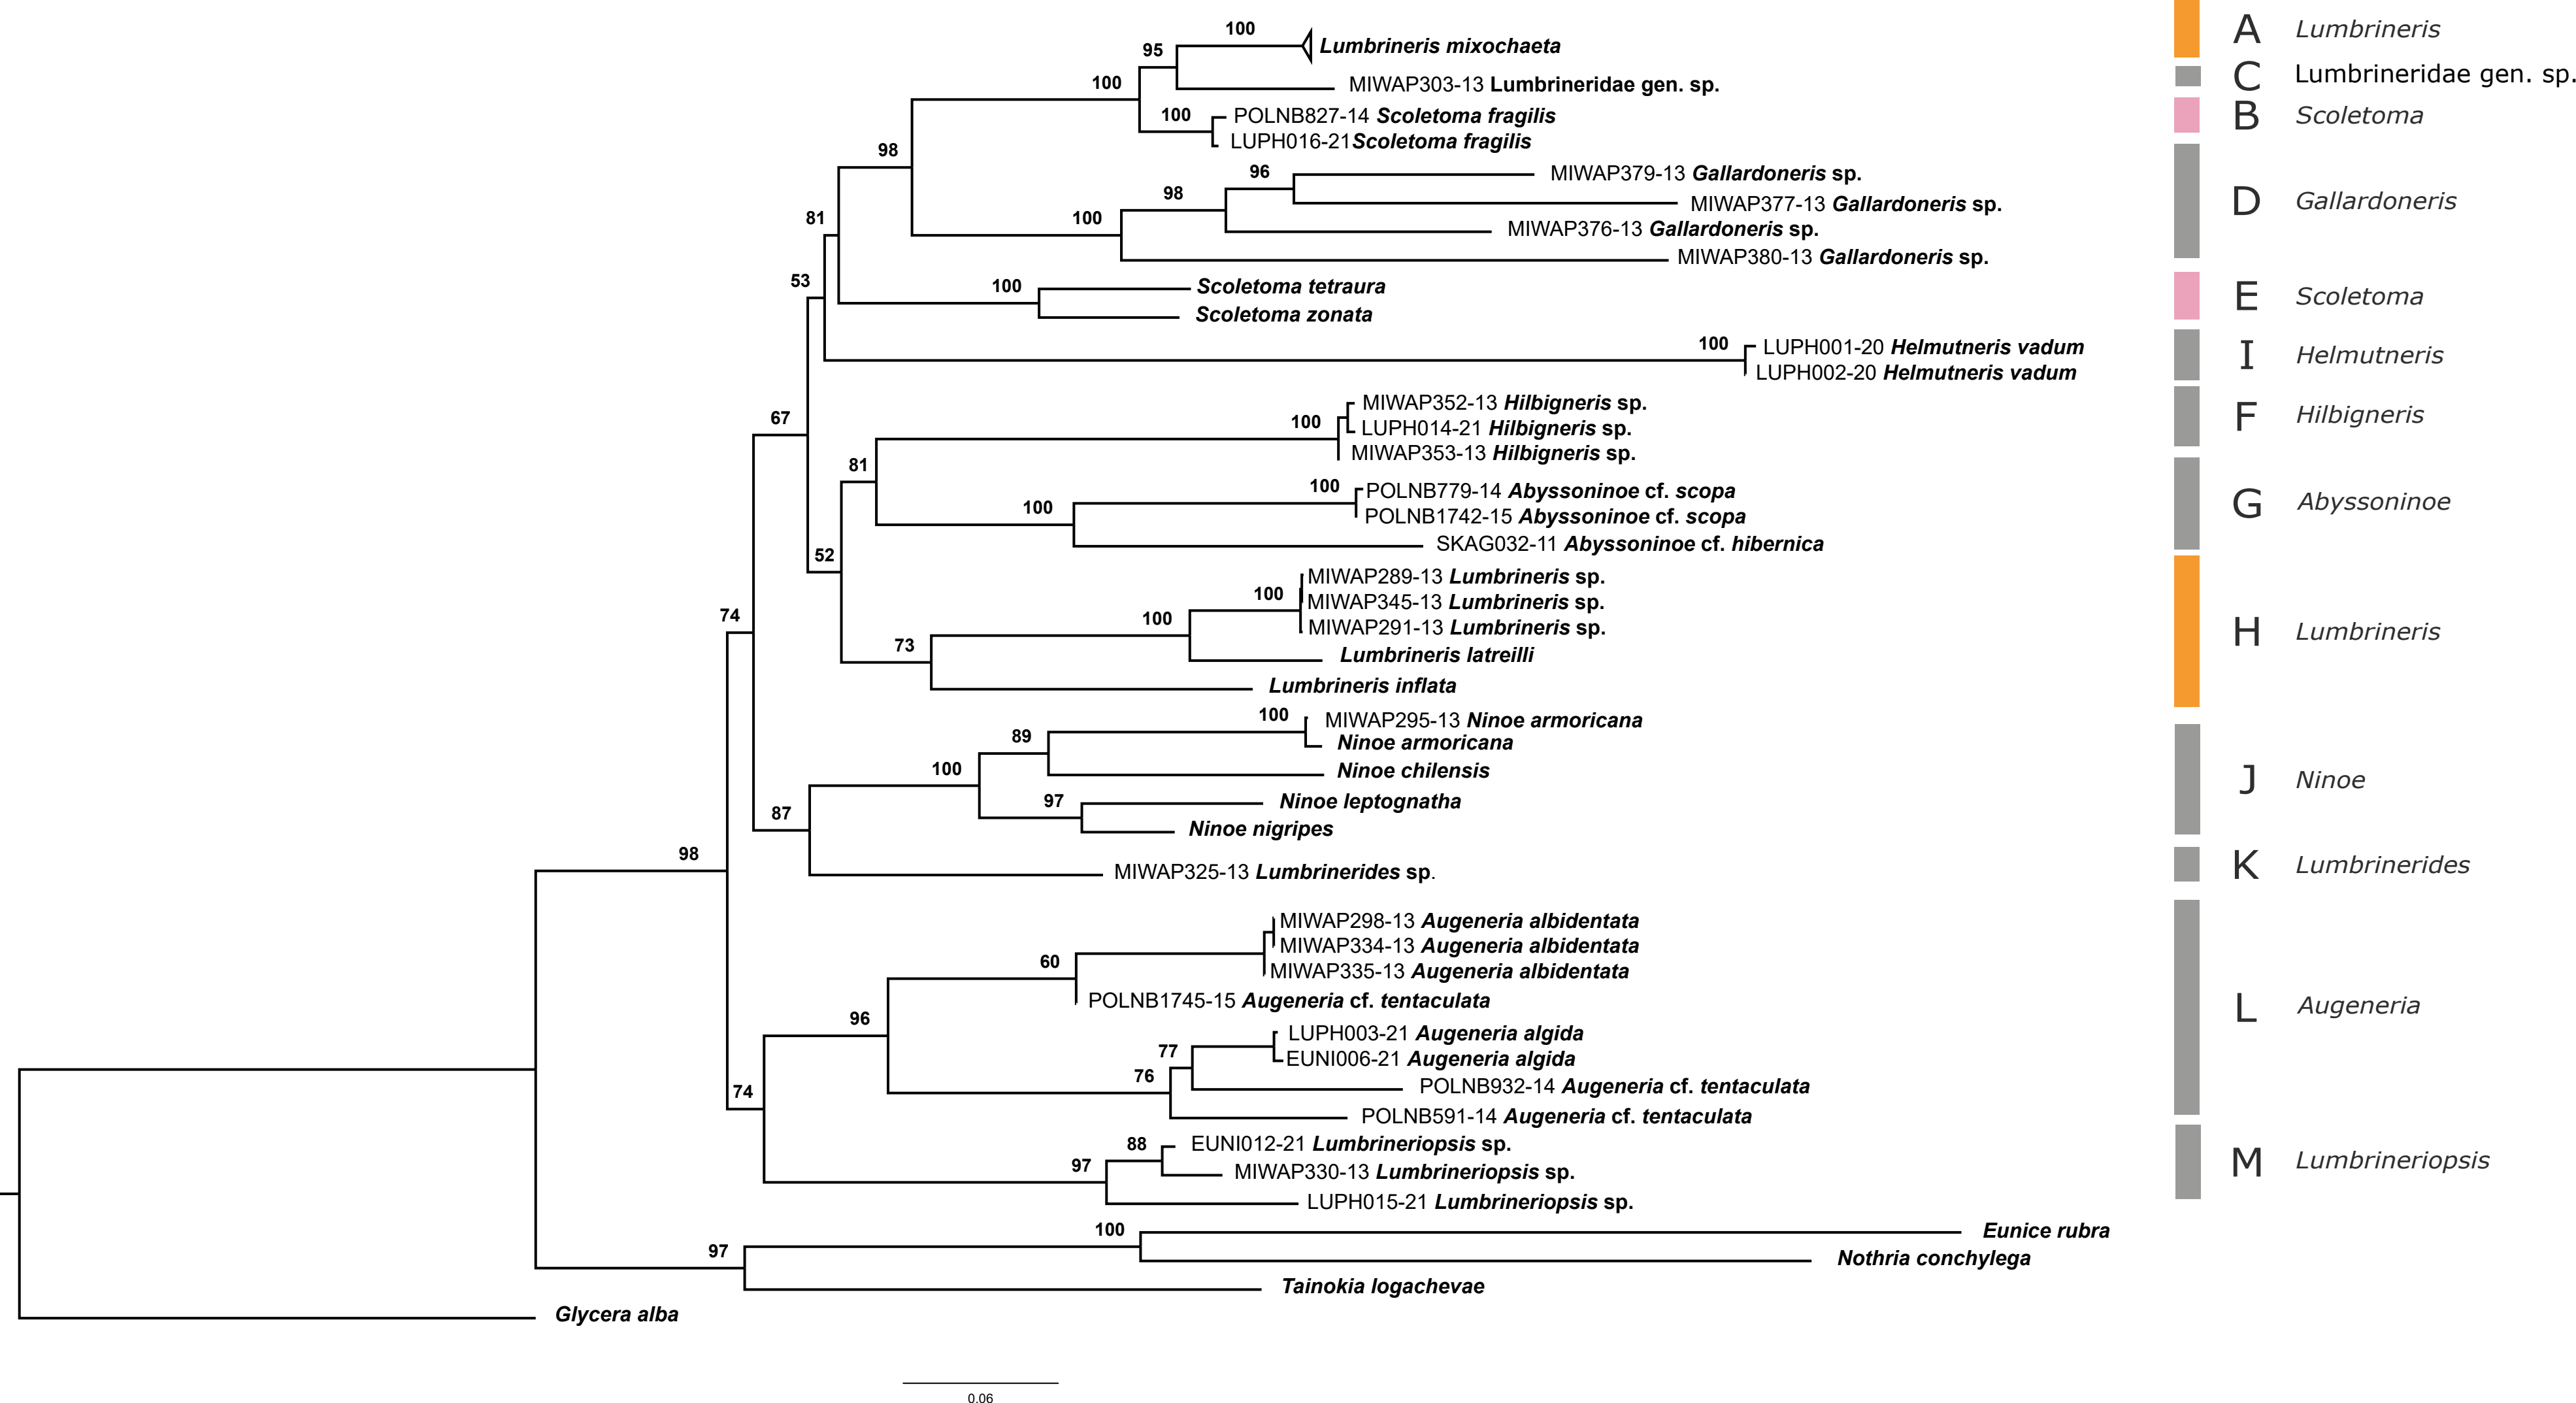

Supplement: s1 [file s1]
